# Supplementary material for: Characterization and Mapping of Soil-Landscape for Site-Specific Soil Management in Ayiba Watershed, Northern Highlands of Ethiopia
Source: Hindawi journal article supplement (doi:10.1155/2023/8899956), 2023-04-14
Supplement: f1 [file 8899956.f1.docx]

Table S1. Critical levels used for classifying soil fertility analytical results.

| **Soil parameters** | **Rating** | | | | | **References** |
| --- | --- | --- | --- | --- | --- | --- |
| **Very Low** | **Low** | **Medium** | **High** | **Very high** |  |
| pH-H2O | <5.5 (SA) | 5.6 - 6.5 (MA) | 6.6 - 7.3 (N) | 7.3 - 8.4 (MAl) | >8.3 (SAl) | EthioSIS, 2014 |
| EC (mS cm-1) | <2 | 2.0-4.0 | 4.0-8.0 | 8.0-16.0 | >16 | EthioSIS, 2014 |
| SOC (%) | <2.0 | 2.0-3.0 | 3.0-7.0 | 7.0-8.0 | >8 | EthioSIS, 2014 |
| TN (%) | <0.1 | 0.1-0.15 | 0.15-0.3 | 0.3-0.5 | >0.5 | EthioSIS, 2014 |
| P (mg kg-1) | 0 -15 | 15 - 30 | 30 - 80 | 80 - 150 | >150 | EthioSIS, 2014 |
| B (mg kg-1) | <0.5 | 0.5-0.8 | 0.8-2.0 | 2.0 - 4.0 | >4 | EthioSIS, 2014 |
| S (mg kg-1) | <10 | 10.0 - 20.0 | 20 - 80 | 80-100 | >100 | EthioSIS, 2014 |
| Ca (Cmol(+)/kg) | <2 | 2.0 -5.0 | 5.0-10.0 | 10.0-20.0 | >20 | EthioSIS, 2014 |
| Mg (Cmol(+)/kg) | <0.3 | 0.3 - 1 | 1.0 - 3.0 | 3.0 -8.0 | >8 | EthioSIS, 2014 |
| Na (Cmol(+)/kg) | <0.1 | 0.1-0.3 | 0.3-0.7 | 0.7-2 | >2 | EthioSIS, 2014 |
| K (Cmol(+)/kg) | <0.2 | 0.2-0.3 | 0.3-0.6 | 0.6-1.2 | >1.2 | EthioSIS, 2014 |
| BS (%) | 0 -20.0 | 20 - 40 | 40 - 60 | 60 - 80 | >80 | EthioSIS, 2014 |
| ESP (%) | <0.5 | 0.5-1.0 | 1.0-3.5 | 3.5-5 | >5 | EthioSIS, 2014 |
| Ca:Mg | <1.0 | 1-2.5 | 2.5-6 | 6.0-10.0 | >10 | EthioSIS, 2014 |
| CEC (Cmol(+)kg-1) | <6 | 6.0 - 12.0 | 12.0 - 25.0 | 25 - 40 | >40 | EthioSIS, 2014 |
| Cu (mg kg-1) | <0.5 | 0.5-0.9 | 1.0 - 20.0 | 20-30 | >30 | EthioSIS, 2014 |
| Zn (mg kg-1) | <1 | 1-1.5 | 1.5-10 | 10.0 - 20.0 | >20 | EthioSIS, 2014 |
| Fe (mg kg-1) | - | 0-2.5 | 2.5-4.5 | >4.5 | - | Elias, 2016 |
| Mn (mg kg-1) | - | <1 | 1.0-5.0 | >5 | - | Elias, 2016 |
| Mn (MAI)* |  | <25 |  |  |  | EthioSIS, 2014 |
| *MnAI=101.7-(15.2*pH) +3.75*Mn-soil | | | | | | |

Note: SA: Strongly Acidic, MA: Moderately Acidic, N: Neutral, MAl: Moderately Alkaline, SAl: Strongly Alkaline, MnAI: Mn activity Index.

Table S2. Characteristics of the toposequence around studied pedons.

| Parameters | AYB-1 | AYB-2 | AYB-3 | AYB-4 | AYB-5 | AYB-6 |
| --- | --- | --- | --- | --- | --- | --- |
| Lithology | Eulian Basalt deposits | Fluvial Basalt deposits | Alluvial/Colluvial Basalt deposits | Alluvial/Colluvial Basalt deposits | Alluvial/Colluvial Basalt deposits | Alluvial/Colluvial Basalt deposits |
| LGP | 120 -140 | 130 -150 | 120 -150 | 120 -130 | 120 -150 | 120 -150 |
| T° (°C) | 15 -20 | 15 -20 | 20 -30 | 20 -30 | 20 -30 | 20 -30 |
| AEZ | Highland - tepid to cool semiarid | Highland - tepid to cool semiarid | Highland - tepid to cool semiarid | Highland - tepid to cool semiarid | Highland - tepid to cool semiarid | Highland - tepid to cool semiarid |
| Vegetation | Grasses and bush | none | Grasses | none | none | none |
| Land uses | Grassland | Cultivated land | Grassland | Cultivated land | Cultivated land | Cultivated land |
| Slope (%) | >60% | >60% | 5 -15% | 15-30% | <5% | <5% |
| Slope/forms | Straight | Straight | Straight | Concave | Straight | Straight |
| Slope/positions | Crest/summit | Shoulder | Backslope | Backslope | Footslope | Toe slope |
| Erosion | sheet and rill | sheet, rill & gully | sheet, rill and gully | sheet, rill and gully | sheet, rill and gully | sheet, rill and gully |
| Micro-relief | Gilgai | Gilgai | Gilgai | Gilgai | Gilgai | Gilgai |
| Drainage | Well | Well | Well | Well | Imperfect | Well |
| Soil type | *Leptosols* | *Luvisols* | *Fluvisols* | *Leptosols* | *Vertisols* | *Cambisols* |

LGP: length of growing period, AEZ: Agroecological zone, AYB: Ayiba

**Table S3**. Some site characteristics of the studied profiles along the toposequence of Ayiba watershed, Northern Ethiopia.

| Profile - ID | Geographical location | | Altitude (m.a.s.l) | Landform | RO [14], CF [15] |
| --- | --- | --- | --- | --- | --- |
| Latitude (N) | Longitude (E) |
| AYB-1 | 12º90'21.8" | 39º55'15.1" | 3304 | Sloping land | Common, Abundant/Large boulders |
| AYB-2 | 12º89'89.8" | 39º33'11.4" | 3030 | Sloping land | Common, Abundant/Large boulders |
| AYB-3 | 12º89'43.6" | 39º54'52.6" | 2989 | Level plateau | None, None / Fine gravel |
| AYB-4 | 12º53'04.3" | 39º33'00.4" | 2905 | Sloping land | Common, Many /Boulders |
| AYB-5 | 12º52'35.5" | 39º32'31.9" | 2744 | Valley floor | None, None / Fine gravel |
| AYB-6 | 12º53'64.3" | 39º31'10.4" | 2752 | Valley floor | None, very few / Medium gravel |

AYB: Ayiba, the study area, M.a.s.l = meters above sea level, [14 & 15] are the list of tables used for soil description in FAO (2006) guideline.

Table S4. Morphological description of the six profiles studied.

| Pedon ID | Coarse fragments **[26,27,29]** | | | Structure **[47,49,50]** | | | Consistency [**53,54,55,56**] | | | Roots **[79,80]** | |
| --- | --- | --- | --- | --- | --- | --- | --- | --- | --- | --- | --- |
| Abundance (%) | Size (mm) | Weathering state | Grade | Type | Size | Dry | moist | wet | Size (mm) | Abundance (%) |
| AYB-1 | None | fine gravel | Fresh | Weak | Massive | FI | SO | LO | NS/NP | M | Common |
|  | Few | FM | Fresh | Strong | Single grain | ME | SO | LO | NS/NP | VF | V.few |
| AYB-2 | Few | FM | Fresh | Weak | Crumbly | VF | SO | LO | S/P | Fine | Common |
|  | Very few | fine gravel | Fresh | Strong | Subangular blocky | ME | EHA | VFI | VS/VP | Fine | V.few |
|  | Very few | fine gravel | Fresh | Strong | Subangular blocky | ME | HA | FR | SS/SP | - | None |
|  | None | fine gravel | Fresh | Strong | Subangular blocky | ME | EHA | VFI | SS/SP | - | None |
| AYB-3 | Very few | fine gravel | Fresh | Weak | Massive | FI | SO | LO | NS/NP | M | Common |
|  | Very few | fine gravel | Fresh | Weak | Massive | VF | SO | LO | NS/NP | VF | V.few |
|  | Very few | fine gravel | Fresh | Weak | Single grain | VF | SO | LO | NS/NP | VF | Few |
|  | Very few | fine gravel | Fresh | Weak | Single grain | VF | SO | LO | NS/NP | VF | V.few |
|  | Very few | fine gravel | Fresh | Moderate | Subangular blocky | ME | SHA | VFR | SS/SP | - | None |
| AYB-4 | None | fine gravel | Fresh | Weak | Massive | VF | LO | LO | NS/NP | Fine | Common |
|  | Common | medium gravel | Fresh | Weak | Massive | VF | LO | LO | NS/NP | - | None |
| AYB-5 | None | fine gravel | Fresh | Moderate | Angular blocky | VF | SO | LO | S/P | Fine | Common |
|  | None | fine gravel | Fresh | Strong | Subangular blocky | ME | HA | LO | VS/VP | VF | V.few |
|  | Very few | fine gravel | Fresh | Strong | Massive | FI | EHA | VFI | SS/SP | - | None |
| AYB-6 | Very few | fine gravel | Weathered | Weak | Massive | FI | LO | LO | NS/NP | Fine | Common |
|  | Common | medium gravel | Fresh | Weak | Single grain | ME | LO | LO | NS/NP | VF | Few |
|  | Common | medium gravel | Fresh | Weak | Single grain | ME | LO | LO | NS/NP | VF | Few |
|  | Few | medium gravel | Fresh | Moderate | Crumbly | FI | SO | LO | SS/SP | VF | V.few |

[26, 27, …, 80] are the tables used for soil description from the FAO (2006) guideline and the symbols used (if) are in accordance with it. FM: fine and medium gravel, FI: fine/thin, ME: medium, VF: very fine/thin; SO; soft, EHA: extremely hard, HA: hard, LO: loose; VFI: very firm, FR: friable, VFR: very friable; NS/NP: non-sticky/non-plastic, S/P: sticky/plastic, SS/SP: slightly sticky/slightly plastic; M: medium, VF: very fine.

FAO. (2006) *Guidelines for soil description* (4th Edition), Food and Agriculture Organization of the United Nations (FAO), Rome, Italy. 109p. Available at [Access date: 12.08.2021]: <http://www.fao.org/docrep/019/a0541e/a0541e.pdf>.
